# Supplementary material for: A Pilot Clinical Study to Investigate the Hypomethylating Properties of Freeze-dried Black Raspberries in Patients with Myelodysplastic Syndrome or Myeloproliferative Neoplasm
Source: PubMed Central journal article supplement — J Cancer Prev. 2022 Jun 30;27(2):129–38. doi: 10.15430/JCP.2022.27.2.129 (PMC9271408; doi:10.15430/jcp.2022.27.2.129), 2022-06-30
Supplement: jcp-27-2-129-supple.pdf [file jcp-27-2-129-supple.pdf]

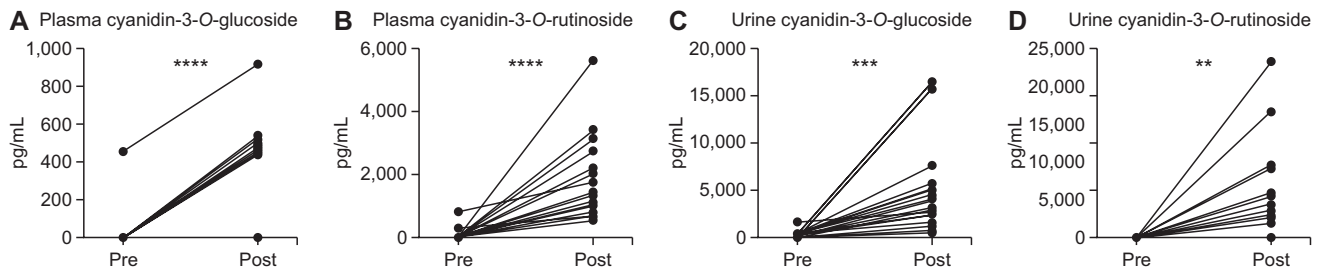

**Figure S1. Plasma and urine anthocyanins before and after BRB intervention.** The circulating blood from all 15 patients before and after BRB intervention was collected to measure (A) Plasma cyanidin-3-O-glucoside. (B) Plasma cyanidin-3-O-rutinoside. (C) Urine cyanidin-3-O-glucoside. (D) Urine cyanidin-3-O-rutinoside. BRB, black raspberry. \*\* $P < 0.01$ , \*\*\* $P < 0.001$ , \*\*\*\* $P < 0.0001$ .

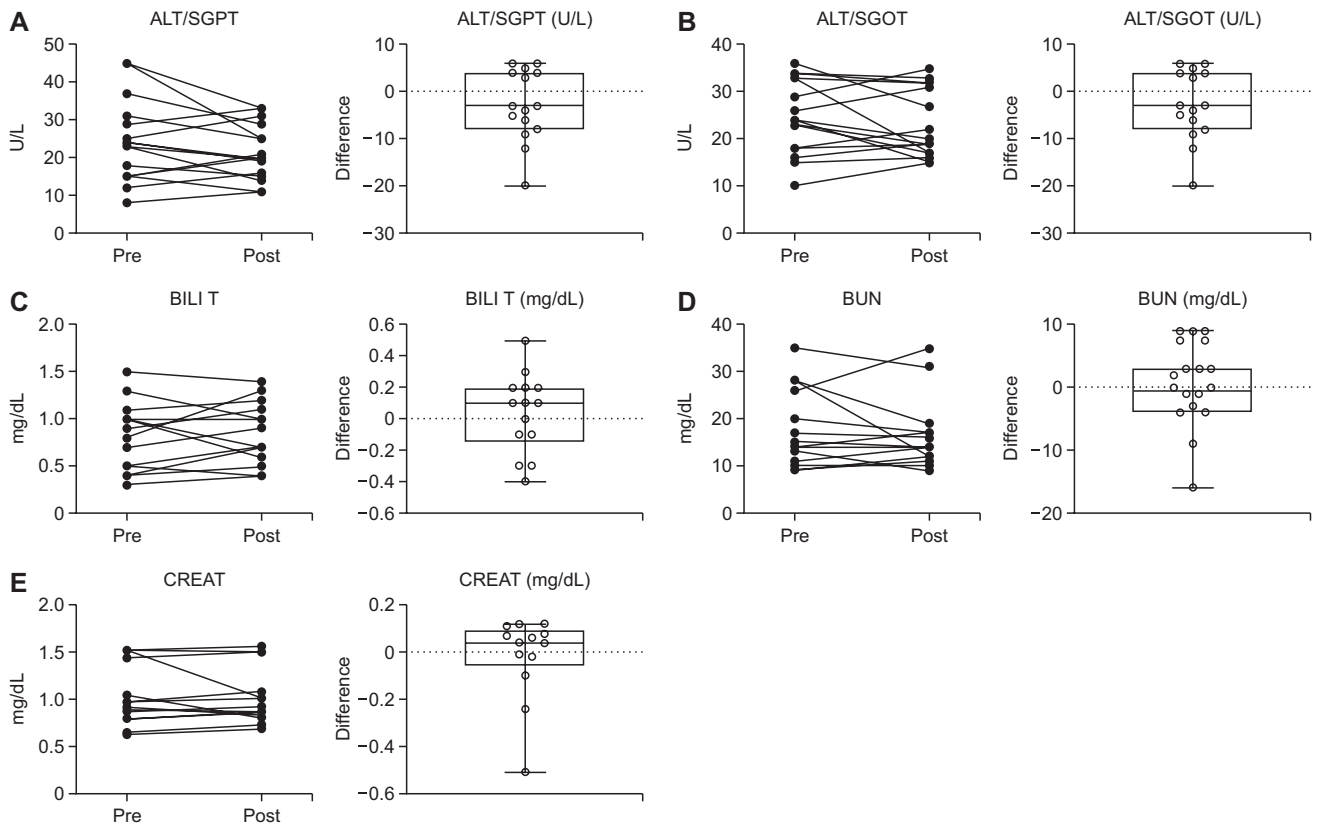

**Figure S2. Blood chemistry before and after BRB intervention.** The circulating blood from all 15 patients before and after BRB intervention was collected to measure. (A) ALT/SGPT, (B) AST/SGOT, (C) BILI T, (D) BUN, (E) CREAT. ALT/SGPT, alanine aminotransferase; AST/SGOT, aspartate aminotransferase; BILI T, bilirubin total; BUN, blood urea nitrogen; BRB, black raspberry; CREAT, creatinine.
